# Supplementary material for: A four-point molecular handover during Okazaki maturation
Source: bioRxiv or medRxiv preprint supplement (doi:10.1101/2022.08.02.502465), 2022-08-02
Supplement: Supplementary file [file media-1.pdf]

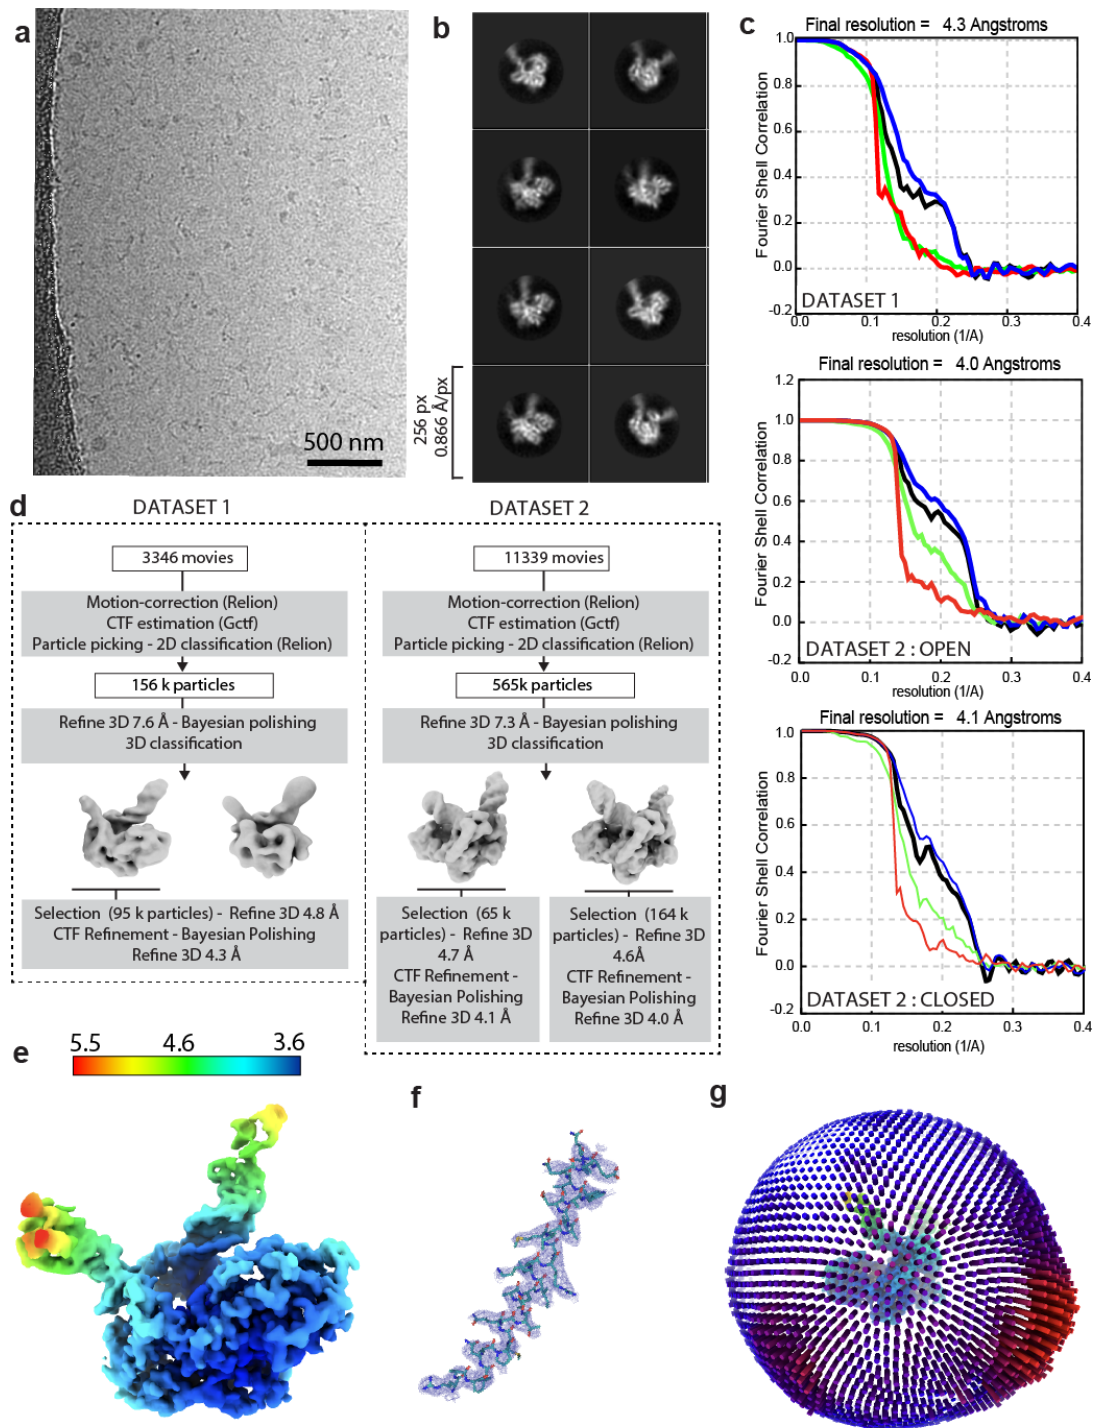

**Extended Data Fig. 1 | Cryo-EM data collection and data processing details.** **a**, Representative micrograph. **b**, 2D class averages from full dataset. **c**, Fourier Shell Correlation between half-maps from final refinement. Green line: unmasked. Blue line: masked. Red line: phase randomized. Black line: corrected. **d**, Schematic

representation of main data processing procedures. See methods section for more details. **e**, Final map obtained applying SuperEM code to Relion post-processed map from dataset 1 and colored by local resolution. **f**, Detail of model fitted to the final cryo-EM map from dataset 1. **g**, Orientational distribution of final set of refined particles from dataset 1.

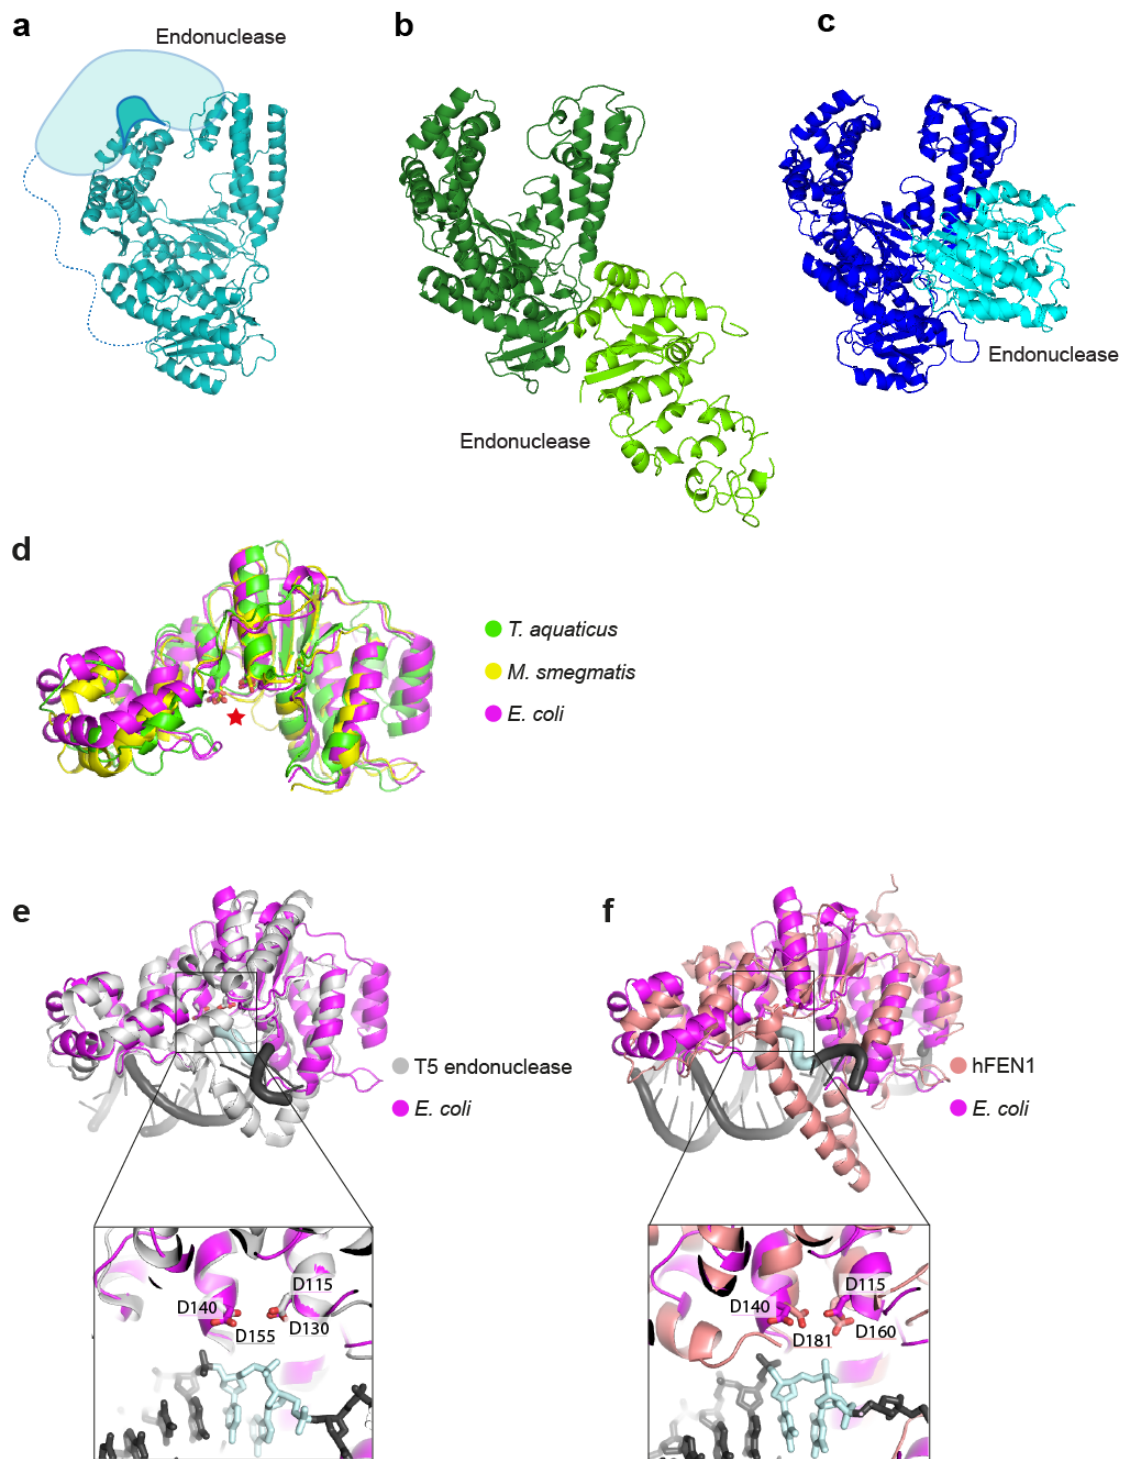

**Extended Data Fig. 2 | Positional modelling of the endonuclease domain in Pol I.**

**a**, *E. coli* Pol I with predicted position of the endonuclease domain on top of the fingers domain, based on the position of the single stranded flap (see also main Fig. 3a).

**b**, *Thermus aquaticus* Pol I with its endonuclease domain adjacent to the 3'-5'

exonuclease domain<sup>33</sup>. **c**, *Mycobacterium smegmatis* Pol I with its endonuclease domain adjacent to the thumb domain<sup>31</sup>. **d**, Superposition of three Pol I endonuclease domains from *T. aquaticus*, *M. smegmatis*, and *E. coli*, (modelled using AlphaFold<sup>34</sup>). Red star marks the endonuclease active site. **e**, Superposition of *E. coli* Pol I endonuclease domain and T5 endonuclease bound to its substrate DNA<sup>35</sup>. The square marks the enlarged area shown below. Site of incision is marked by the two nucleotides in light blue. Two catalytic aspartates are shown in sticks. **f**, Similar comparison with human FEN1<sup>36</sup>. Structures of T5 endonuclease and FEN1 were used to model the position of Pol I endonuclease in main Fig. 3b.

**a**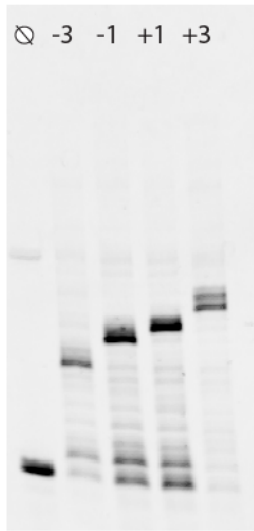**b**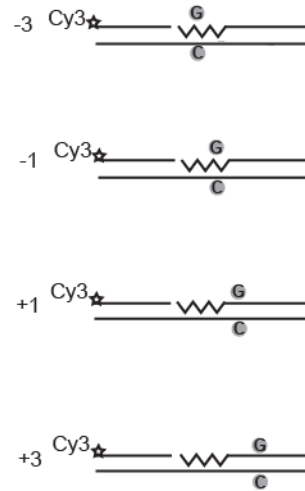

**Extended Data Fig. 3 | Pol I does not progress past a C in the template strand in absence of dGTP. a**, Pol I activity in absence of LigA using the templates shown in panel b, using only the three nucleotides dATP, dCTP, and dTTP. Experimental conditions are the same as in Fig. 5b. **b**, Substrates used for experiment in panel a.

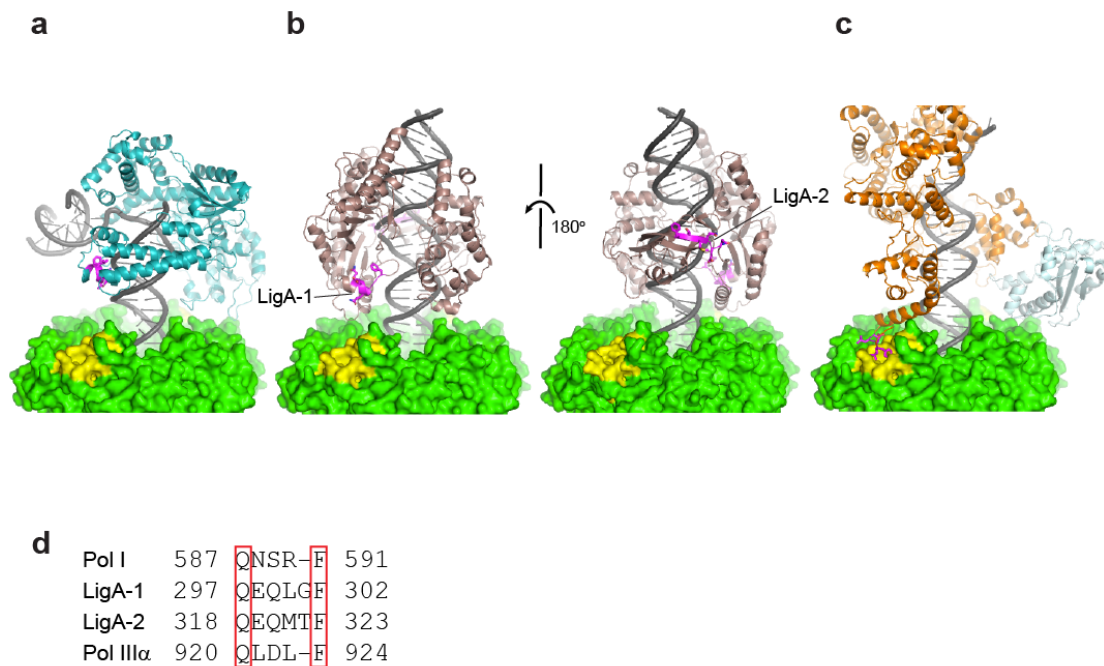

**Extended Data Fig. 4 | The location of  $\beta$ -binding motifs of Pol I, LigA and Pol III $\alpha$ .** **a**, Model of Pol I and  $\beta$ -clamp. The  $\beta$ -clamp is shown in green surface, with binding pocket highlighted in yellow. The predicted  $\beta$ -binding motif of Pol I is shown in magenta sticks and is located in a helix of the thumb domain that interacts with the minor groove of the DNA. **b**, Model of LigA<sup>79</sup> and  $\beta$ -clamp shown in two views rotated by 180°. The two predicted  $\beta$ -binding motifs are shown in magenta sticks. Motif LigA-1 is located in a helix that precedes a loop that interacts with the DNA. Motif LigA-2 is located on a strand that is part of the OB-domain that also interacts with the DNA. **c**, Cryo-EM structure of Pol III $\alpha$  bound to the  $\beta$ -clamp, exonuclease  $\epsilon$ , and DNA<sup>52</sup>. The Pol III $\alpha$   $\beta$ -binding motif is shown in magenta sticks and located on a loop at the end of the fingers domain and interacts with the binding pocket of the  $\beta$ -clamp. **d**, Alignment of  $\beta$ -binding motifs from Pol I, LigA and Pol III $\alpha$  that are highlighted in magenta in panels a-c.

| <b>Primer name</b>          | <b>Length</b> | <b>5'-3' sequence</b>        |
|-----------------------------|---------------|------------------------------|
| ASP115ALA Fw                | 26            | GCGTAGAAGCGGCCGACGTTATCGGT   |
| ASP115ALA Rv                | 26            | ACCGATAACGTCGGCCGCTTCTACGC   |
| ASP140ALA Fw                | 28            | GCACTGGCGATAAAGCTATGGCGCAGCT |
| ASP140ALA Rv                | 28            | AGCTGCGCCATAGCTTTATCGCCAGTGC |
| Third Stop Codon<br>Pol1 Fw | 24            | TGCTGATGTCTAAGCGGGCAAATG     |
| Third Stop Codon<br>Pol1 Rv | 24            | CATTTGCCCGCTTAGACATCAGCA     |

**Supplementary Table 1** Primers used for cloning and mutagenesis

| Figure n° | Panel | Sequences                                                                                                                                          |                                                                                                                                                  |                                                                                                                                                  |
|-----------|-------|----------------------------------------------------------------------------------------------------------------------------------------------------|--------------------------------------------------------------------------------------------------------------------------------------------------|--------------------------------------------------------------------------------------------------------------------------------------------------|
| 1         | A     | 5' Cy3-GGTAACGCCAGGGTTTTCCAGTC 3'<br>3' CCATTGCGGTCCCAAAGGGTCAGTGAAGTGCTTAGATCTGCTGCAACATTTTGCTGCCGGTCACTCGC 5'                                    |                                                                                                                                                  |                                                                                                                                                  |
|           | B     | 5' Cy3-GGTAACGCCAGGGTTTTCCAGTC ACGACGTTGTA AAAACGACGGCCAGTGAGCG 3'<br>3' CCATTGCGGTCCCAAAGGGTCAGTGAAGTGCTTAGATCTGCTGCAACATTTTGCTGCCGGTCACTCGC 5'   |                                                                                                                                                  |                                                                                                                                                  |
|           | C     | 5' Cy3-GGTAACGCCAGGGTTTTCCAGTC *ACGACGTTGTA AAAACGACGGCCAGTGAGCG 3'<br>3' CCATTGCGGTCCCAAAGGGTCAGTGAAGTGCTTAGATCTGCTGCAACATTTTGCTGCCGGTCACTCGC 5'  |                                                                                                                                                  |                                                                                                                                                  |
| 3         | D     | 5' Cy3-GGTAACGCCAGGGTTTTCCAGTC 3'<br>3' CCATTGCGGTCCCAAAGGGTCAGTGAAGTGCTTAGATCTGCTGCAACATTTTGCTGCCGGTCACTCGC 5'                                    |                                                                                                                                                  |                                                                                                                                                  |
|           | E     | 5' Cy3-GGTAACGCCAGGGTTTTCCAGTCACGACGTTGTA AAAACGACGGCCAGTGAGCG 3'<br>3' CCATTGCGGTCCCAAAGGGTCAGTGAAGTGCTTAGATCTGCTGCAACATTTTGCTGCCGGTCACTCGC 5'    |                                                                                                                                                  |                                                                                                                                                  |
|           | F     | 5' GGTAACGCCAGGGTTTTCCAGTCACGACGTTGTA AAAACGACGGCCAGTGAGCG-Cy5 3'<br>3' CCATTGCGGTCCCAAAGGGTCAGTGAAGTGCTTAGATCTGCTGCAACATTTTGCTGCCGGTCACTCGC 5'    | 5' GGTAACGCCAGGGTTTTCCAGTCGACGTTGTA AAAACGACGGCCAGTGAGCG-Cy5 3'<br>3' CCATTGCGGTCCCAAAGGGTCAGTGAAGTGCTTAGATCTGCTGCAACATTTTGCTGCCGGTCACTCGC 5'    | 5' GGTAACGCCAGGGTTTTCCAGTCGTAACGTTGTA AAAACGACGGCCAGTGAGCG-Cy5 3'<br>3' CCATTGCGGTCCCAAAGGGTCAGTGAAGTGCTTAGATCTGCTGCAACATTTTGCTGCCGGTCACTCGC 5'  |
| 4         | A     | 5' CTTAACTCCAACCTTTTCCCAATCACTTCACGAACCACATTCTAAAACCACTTCCATTCACCT-Cy5 3'<br>3' GAATTGAGGTTGGAAAAGGGTTAGTGAAGTGCTTGGTGAAGATTTTGGTGAAGGTAAGTGGA 5'  |                                                                                                                                                  |                                                                                                                                                  |
|           | B     | 5' CTTAACTCCAACCTTTTCCCAATCACUUCACGAAACACATTCTAAAACCACTTCCATTCACCT-Cy5 3'<br>3' GAATTGAGGTTGGAAAAGGGTTAGTGAAGTGCTTGGTGAAGATTTTGGTGAAGGTAAGTGGA 5'  |                                                                                                                                                  |                                                                                                                                                  |
|           | C     | 5' CTTAACTCCAACCTTTTCCCAA ACUUCACUAA GCACATTCTAAAACCACTTCCATTCACCT-Cy5 3'<br>3' GAATTGAGGTTGGAAAAGGGTTAGTGAAGTGATTGGCGTAAGATTTTGGTGAAGGTAAGTGGA 5' | 5' CTTAACTCCAACCTTTTCCC ACUUCACUAA GCACATTCTAAAACCACTTCCATTCACCT-Cy5 3'<br>3' GAATTGAGGTTGGAAAAGGGTTAGTGAAGTGATTGGCGTAAGATTTTGGTGAAGGTAAGTGGA 5' | 5' CTTAACTCCAACCTTTTCCC ACUUCACUAA GCACATTCTAAAACCACTTCCATTCACCT-Cy5 3'<br>3' GAATTGAGGTTGGAAAAGGGTTAGTGAAGTGATTGGCGTAAGATTTTGGTGAAGGTAAGTGGA 5' |



|   |   |                                                                                                                                                                                                                                                                                                                                                                                                                                                                                                                                                                                                                                                                                                                                                                                                                                |
|---|---|--------------------------------------------------------------------------------------------------------------------------------------------------------------------------------------------------------------------------------------------------------------------------------------------------------------------------------------------------------------------------------------------------------------------------------------------------------------------------------------------------------------------------------------------------------------------------------------------------------------------------------------------------------------------------------------------------------------------------------------------------------------------------------------------------------------------------------|
| 5 | A | <p>5' Cy3-GGTAACGCCAGGGTTTTCCCAAGT<u>C</u><sup>*</sup>ACGACGTTGTAAAACGACGGCCAGTGAGCG 3'<br/>3' CCATTGCGGTCCCAAAAGGGTCAGTGCTGCAACATTTTGCTGCCGGTCACTCGC 5'</p> <p>5' Cy3-GGTAACGCCAGGGTTTTCCCAAGT<u>C</u><sup>*</sup>ACGACGTTGTAAAACGACGGCCAGTGAGCG 3'<br/>3' CCATTGCGGTCCCAAAAGGGTCAGTGCTGCAACATTTTGCTGCCGGTCACTCGC 5'</p> <p>5' Cy3-GGTAACGCCAGGGTTTTCCCAAGT<u>C</u><sup>*</sup>ACGACGTTGTAAAACGACGGCCAGTGAGCG 3'<br/>3' CCATTGCGGTCCCAAAAGGGTCAGTGCTGCAACATTTTGCTGCCGGTCACTCGC 5'</p> <p>5' Cy3-GGTAACGCCAGGGTTTTCCCAAGT<u>C</u><sup>*</sup><b>ACGACGUUGUAAAACGACGGCCAGUGAGCG</b> 3'<br/>3' CCATTGCGGTCCCAAAAGGGTCAGTGCTGCAACATTTTGCTGCCGGTCACTCGC 5'</p>                                                                                                                                                                     |
|   | B | <p>5' Cy3-CTTAACGCCAACCTTTTCCCAAT<u>CACUUCACGAA</u>CCACATTCTAAAACCACTTCCATTACCT 3'<br/>3' GAATTGAGGTTGGAAAAGGGTTAGTGAAGTGCTTGGTGAAGATTTTGGTGAAGGTAAGTGA 5'</p> <p>5' Cy3-CTTAACGCCAACCTTTTCCCAAT<u>CACUUCACUAG</u>CCACATTCTAAAACCACTTCCATTACCT 3'<br/>3' GAATTGAGGTTGGAAAAGGGTTAGTGAAGTGATCGGTGTAAGATTTTGGTGAAGGTAAGTGA 5'</p> <p>5' Cy3-CTTAACGCCAACCTTTTCCCAAT<u>CACUUCACUAA</u>GCACATTCTAAAACCACTTCCATTACCT 3'<br/>3' GAATTGAGGTTGGAAAAGGGTTAGTGAAGTGATTCGTGTAAGATTTTGGTGAAGGTAAGTGA 5'</p> <p>5' Cy3-CTTAACGCCAACCTTTTCCCAAT<u>CACUUCACUAA</u>GCACATTCTAAAACCACTTCCATTACCT 3'<br/>3' GAATTGAGGTTGGAAAAGGGTTAGTGAAGTGATTCGTGTAAGATTTTGGTGAAGGTAAGTGA 5'</p> <p>5' Cy3-CTTAACGCCAACCTTTTCCCAAT<u>CACUUCACUAA</u>CCGCATTCTAAAACCACTTCCATTACCT 3'<br/>3' GAATTGAGGTTGGAAAAGGGTTAGTGAAGTGATTGGCGTAAGATTTTGGTGAAGGTAAGTGA 5'</p> |
| 6 | A | <p>5' Cy3-GGTAACGCCAGGGTTTTCCCAAGT<u>C</u>ACGACGTTGTAAAACGACGGCCAGTGAGCG 3'<br/>3' CCATTGCGGTCCCAAAAGGGTCAGTGCTGCAACATTTTGCTGCCGGTCACTCGC 5'</p>                                                                                                                                                                                                                                                                                                                                                                                                                                                                                                                                                                                                                                                                               |

**Supplementary Table 2** Primers used for primer extension assays. RNA highlighted in bold. Underlined letters indicate the position of the nick. Phosphorylation of substrate at 5' end indicated with an asterisk.

| Substrate name | Sequences                                                                                                                               |
|----------------|-----------------------------------------------------------------------------------------------------------------------------------------|
| Continuous     | 5' GGTAACGCCAGGGTTTTCC <u>C</u> AGTCACGACGTTGTAAAACGACGGCCAGTGAGCG-B 3'<br>3' B-CCATTGCGGTCCCAAAGGGTCAGTGCTGCAACATTTGCTGCCGGTCACTCGC 5' |
| Primed         | 5' AC <u>G</u> ACGTTGTAAAACGACGGCCAGTGAGCG-B 3'<br>3' B-CCATTGCGGTCCCAAAGGGTCAGTGCTGCAACATTTGCTGCCGGTCACTCGC 5'                         |
| Nicked         | 5' GGTAACGCCAGGGTTTTCC <u>C</u> AGTCACGACGTTGTAAAACGACGGCCAGTGAGCG-B 3'<br>3' B-CCATTGCGGTCCCAAAGGGTCAGTGCTGCAACATTTGCTGCCGGTCACTCGC 5' |

**Supplementary Table 3** Primers used for biolayer interferometry assays.

Underlined letters indicate the position of the nick. All primers contain a biotin at 3' end.
